# Supplementary material
Source: PubMed Central journal article supplement (PMC3605734)
Supplement: NIHMS442901-supplement-Supplementary_Data.pdf [file NIHMS442901-supplement-Supplementary_Data.pdf]

default input parameters except that the minimum coverage was set to 4 for both SNP and DIP detection while the minimum SNP variant frequency was set to 90% and the minimum DIP variant frequency was set to 70%. Coverage level distribution and coverage versus GC content were determined using the “create detailed mapping report” function. Unique 5′ end counting was done on the Tufts University Galaxy server using the *hopcount* script as previously described (2).

## References

1. **Boulé, J.-B., F. Rougeon, and C. Papanicolaou.** 2001. Terminal deoxynucleotidyl transferase indiscriminately incorporates ribonucleotides and deoxyribonucleotides. *J. Biol. Chem.* 276(33):31388–31393.
2. **Klein, B.A., E.L. Tenorio, D.W. Lazinski, A. Camilli, M.J. Duncan, and L.T. Hu.** 2012. Identification of essential genes of the periodontal pathogen *Porphyromonas gingivalis*. *BMC Genomics* 13:578.

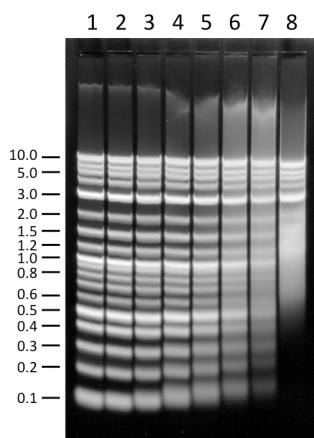

**Supplementary Figure S1. Titration of ddCTP with dCTP in tailing reactions resolved with 2.0% agarose electrophoresis.** All tailing reactions contain 1  $\mu$ g 2-log DNA ladder (NEB) and were set up as described in the “Materials and methods” section, except that concentrations of ddCTP to dCTP were varied as follows: lane 1: 0  $\mu$ M ddCTP, 0  $\mu$ M dCTP; lane 2: 250  $\mu$ M ddCTP, 250  $\mu$ M dCTP; lane 3: 125  $\mu$ M ddCTP, 375  $\mu$ M dCTP; lane 4: 67.5  $\mu$ M ddCTP, 432.5  $\mu$ M dCTP; lane 5: 33.75  $\mu$ M ddCTP, 466.25  $\mu$ M dCTP; lane 6: 16.88  $\mu$ M ddCTP, 483  $\mu$ M dCTP; lane 7: 8.44  $\mu$ M ddCTP, 491.56  $\mu$ M dCTP; lane 8: 0  $\mu$ M ddCTP, 500  $\mu$ M dCTP. The sizes of bands in lane 1, from bottom to top, are 100 bp, 200 bp, 300 bp, 400 bp, 500 bp, 600 bp, 700 bp, 800 bp, 900 bp, 1000 bp, 1200 bp, 1500 bp, 2000 bp, 3000 bp, 4000 bp, 6000 bp, 8000 bp, and 10,000 bp. Note in lane 8 the complete absence of bands smaller than 400 bp and the smearing of bands greater than this size. This indicates that, in the absence of ddCTP, TdT added tails to the 100-bp band of sufficient length that the resulting molecules ran with apparent sizes in excess of 400 bp. Furthermore, since all of the 100-, 200-, and 300-bp bands were absent from lane 8, we conclude that TdT quantitatively added these long tails to essentially all molecules. Note in lane 7 that, relative to lane 1, the mobility of the center of the 100-bp band was shifted by  $\sim$ 60 bp. Thus, when ddCTP represented only 1/64 of the total amount of deoxynucleotide triphosphate precursor, the apparent mobility was shifted by  $\sim$ 64 bp. To a first approximation, this indicates that the affinity of TdT is similar for ddCTP and dCTP; this is consistent with previous observations (1).

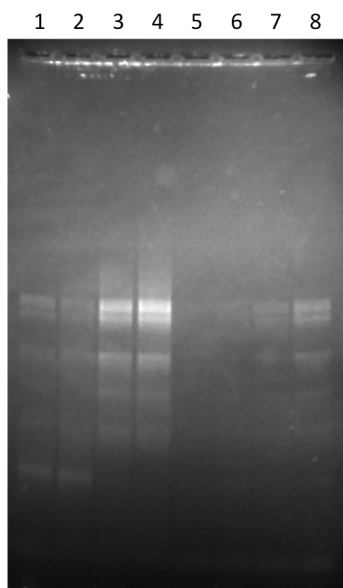

**Supplementary Figure S2. Evaluation of the efficiency of HTML-PCR reactions promoted by different lengths of dC/dG pairing during the ligation step.** One nanogram of pUC19 DNA was linearized with the blunt-cleaving restriction endonuclease BstU I, C-tailed, and then ligated to oligonucleotides that were identical except for the length of their 3' oligo dG stretches. In lanes 1 and 5, the oligonucleotide contained four dG residues at its 3' terminus, five dG residues in lanes 2 and 6, six dG residues in lanes 3 and 7, and seven dG residues in lanes 4 and 8. Following ligation, the eight substrates were amplified in PCR reactions with common primers for either 30 cycles (lanes 1–4) or 20 cycles (lanes 5–8) and the products were resolved by 2.0% agarose electrophoresis. Of the 20-cycle reactions, lane 8 showed the greatest intensity of products; hence, we conclude that the added stability of seven dC/dG pairs enhanced the efficiency of ligation.

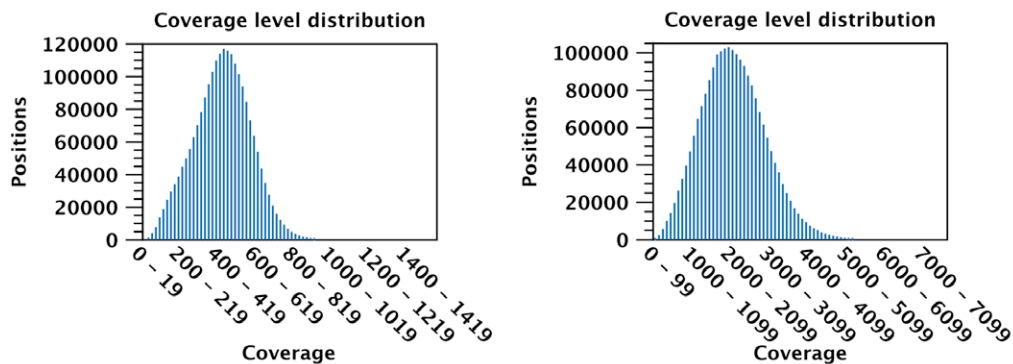

Supplementary Figure S3. Comparison of the coverage level distributions of libraries generated by HTML-PCR (A) or Nextera (B). Note that five-fold more of the Nextera sample was sequenced relative to the HTML-PCR sample; thus, respective x axes are scaled accordingly.

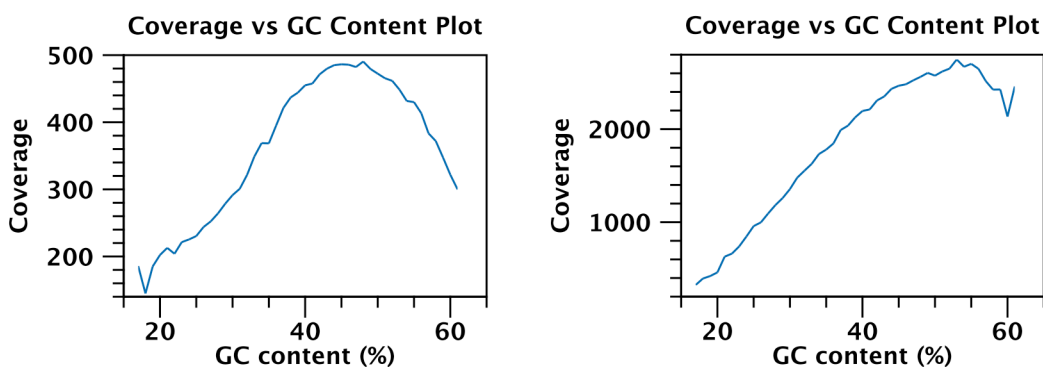

Supplementary Figure S4. Comparison of the coverage (as a function of GC content) of libraries generated by HTML-PCR (A) or Nextera (B). Note that five-fold more of the Nextera sample was sequenced relative to the HTML-PCR sample; thus, respective y axes are scaled accordingly.

Supplementary Table S1. Single Nucleotide Polymorphisms (SNPs) in the E7946 Sequence.

| Reference Genome used for mapping | Reference Position | Variation Type | Reference nucleotide* | SNP Variation* | Frequency (%)** | Counts | Coverage | Annotations for site                                                       | Amino Acid Change |
|-----------------------------------|--------------------|----------------|-----------------------|----------------|-----------------|--------|----------|----------------------------------------------------------------------------|-------------------|
| NC_002505                         | 42082              | SNP            | A                     | C              | 100             | 107    | 107      | Gene: Gene, CDS: sun protein                                               | Asp407Glu         |
| NC_002505                         | 125122             | SNP            | A                     | C              | 100             | 261    | 261      | Gene: Gene, CDS: GGDEF family protein                                      | Asn451His         |
| NC_002505                         | 162660             | SNP            | N                     | C              | 100             | 207    | 207      | Gene: Gene, CDS: hypothetical protein                                      | Xxx330Gly         |
| NC_002505                         | 172531             | SNP            | K                     | T              | 100             | 224    | 224      | Gene: Gene, CDS: peptide ABC transporter, permease protein                 | Xxx178Leu         |
| NC_002505                         | 262291             | SNP            | G                     | T              | 94.4            | 17     | 18       | Gene: Gene, CDS: rfbT-related protein                                      | Cys65Phe          |
| NC_002505                         | 263544             | SNP            | T                     | C              | 100             | 5      | 5        | Gene: Gene, CDS: rfbT protein                                              |                   |
| NC_002505                         | 263545             | SNP            | A                     | C              | 100             | 8      | 8        | Gene: Gene, CDS: rfbT protein                                              | Thr4Pro           |
| NC_002505                         | 364992             | SNP            | K                     | G              | 99.1            | 211    | 213      | Gene: Gene, CDS: hypothetical protein                                      | Xxx69Gly          |
| NC_002505                         | 401063             | SNP            | A                     | G              | 100             | 227    | 227      | Gene: Gene, CDS: phosphoadenosine phosphosulfate reductase                 |                   |
| NC_002505                         | 424629             | SNP            | G                     | T              | 100             | 170    | 170      | Gene: Gene, CDS: regulatory protein CsrD                                   |                   |
| NC_002505                         | 424772             | SNP            | G                     | T              | 98.6            | 207    | 210      | Gene: Gene, CDS: regulatory protein CsrD                                   | Arg504Leu         |
| NC_002505                         | 479266             | SNP            | G                     | T              | 91.7            | 11     | 12       |                                                                            |                   |
| NC_002505                         | 575609             | SNP            | A                     | G              | 100             | 228    | 228      | Gene: recA, CDS: recA                                                      | Tyr363Cys         |
| NC_002505                         | 581125             | SNP            | T                     | G              | 98.6            | 70     | 71       | Gene: tRNA-Arg-3, tRNA: tRNA-Arg-3                                         |                   |
| NC_002505                         | 663766             | SNP            | T                     | A              | 99.5            | 217    | 218      | Gene: Gene, CDS: hypothetical protein                                      | Leu82Phe          |
| NC_002505                         | 697746             | SNP            | A                     | G              | 100             | 288    | 288      | Gene: Gene, CDS: c-di-GMP phosphodiesterase A-related protein              | Val555Ala         |
| NC_002505                         | 854836             | SNP            | K                     | G              | 100             | 168    | 168      | Gene: Gene, CDS: citrate lyase, beta subunit                               | Xxx91Gly          |
| NC_002505                         | 906942             | SNP            | A                     | G              | 100             | 195    | 195      | Gene: Gene, CDS: hypothetical protein                                      |                   |
| NC_002505                         | 929971             | SNP            | T                     | C              | 100             | 88     | 88       | Gene: Gene, CDS: Slt family transglycosylase                               |                   |
| NC_002505                         | 1011632            | SNP            | W                     | A              | 99.6            | 233    | 234      | Gene: Gene, CDS: D-alanyl-D-alanine carboxypeptidase                       | Xxx194Asp         |
| NC_002505                         | 1183050            | SNP            | A                     | G              | 100             | 200    | 200      | Gene: Gene, CDS: 8-amino-7-oxononanoate synthase                           | Arg20Gly          |
| NC_002505                         | 1237259            | SNP            | C                     | G              | 97.9            | 187    | 191      | Gene: Gene, CDS: hypothetical protein                                      | Glu192Gln         |
| NC_002505                         | 1237260            | SNP            | G                     | C              | 98.9            | 188    | 190      | Gene: Gene, CDS: hypothetical protein                                      | His191Gln         |
| NC_002505                         | 1335598            | SNP            | A                     | G              | 100             | 157    | 157      | Gene: Gene, CDS: hypothetical protein                                      | Asn107Ser         |
| NC_002505                         | 1417919            | SNP            | T                     | G              | 99.4            | 158    | 159      | Gene: Gene, CDS: hypothetical protein                                      |                   |
| NC_002505                         | 1542173            | SNP            | C                     | T              | 99.4            | 180    | 181      | Gene: Gene, CDS: sensor histidine kinase/response regulator                | Ser241Leu         |
| NC_002505                         | 1561424            | SNP            | K                     | G              | 100             | 174    | 174      | Gene: Gene, CDS: RTX toxin RtxA                                            | Xxx3773Asp        |
| NC_002505                         | 1561926            | SNP            | S                     | C              | 100             | 164    | 164      | Gene: Gene, CDS: RTX toxin RtxA                                            | Xxx3940Ala        |
| NC_002505                         | 1561942            | SNP            | S                     | G              | 100             | 151    | 151      | Gene: Gene, CDS: RTX toxin RtxA                                            |                   |
| NC_002505                         | 1561949            | SNP            | W                     | A              | 100             | 158    | 158      | Gene: Gene, CDS: RTX toxin RtxA                                            | Xxx3948Asn        |
| NC_002505                         | 1587146            | SNP            | K                     | G              | 100             | 4      | 4        | Gene: Gene, CDS: ATP-dependent protease LA-related protein                 |                   |
| NC_002505                         | 1587147            | SNP            | Y                     | T              | 100             | 4      | 4        | Gene: Gene, CDS: ATP-dependent protease LA-related protein                 |                   |
| NC_002505                         | 1587148            | SNP            | Y                     | C              | 100             | 6      | 6        | Gene: Gene, CDS: ATP-dependent protease LA-related protein                 |                   |
| NC_002505                         | 1587149            | SNP            | Y                     | T              | 100             | 10     | 10       | Gene: Gene, CDS: ATP-dependent protease LA-related protein                 | Xxx196Ser         |
| NC_002505                         | 1587765            | SNP            | W                     | T              | 99.5            | 205    | 206      | Gene: Gene, CDS: ATP-dependent protease LA-related protein                 | Xxx401Val         |
| NC_002505                         | 1591816            | SNP            | A                     | G              | 100             | 194    | 194      | Gene: Gene, Restriction site: BsaBI, CDS: ABC transporter ATPase component |                   |

Supplementary Table S1 (continued). Single Nucleotide Polymorphisms (SNPs) in the E7946 Sequence.

| Reference Genome used for mapping | Reference Position | Variation Type | Reference nucleotide* | SNP Variation* | Frequency (%)** | Counts | Coverage | Annotations for site                                                                                            | Amino Acid Change |
|-----------------------------------|--------------------|----------------|-----------------------|----------------|-----------------|--------|----------|-----------------------------------------------------------------------------------------------------------------|-------------------|
| NC_002505                         | 1670764            | SNP            | W                     | T              | 100             | 234    | 234      |                                                                                                                 |                   |
| NC_002505                         | 1696639            | SNP            | Y                     | C              | 99.2            | 130    | 131      | Gene: Gene, CDS: catalase                                                                                       | Asx522Asp         |
| NC_002505                         | 1696645            | SNP            | Y                     | C              | 99.2            | 119    | 120      | Gene: Gene, CDS: catalase                                                                                       | Xxx520Ala         |
| NC_002505                         | 1735241            | SNP            | M                     | C              | 99.5            | 201    | 202      | Gene: Gene                                                                                                      |                   |
| NC_002505                         | 1792474            | SNP            | C                     | A              | 100             | 246    | 246      | Gene: Gene                                                                                                      |                   |
| NC_002505                         | 2010846            | SNP            | G                     | A              | 100             | 112    | 112      | Gene: Gene, CDS: methyl-accepting chemotaxis protein                                                            | Arg483Cys         |
| NC_002505                         | 2076300            | SNP            | A                     | G              | 100             | 187    | 187      | Gene: Gene, CDS: C4-dicarboxylate transport sensor protein                                                      | Asn187Ser         |
| NC_002505                         | 2122955            | SNP            | R                     | G              | 100             | 145    | 145      | Gene: Gene, CDS: O-succinylbenzoic acid--CoA ligase                                                             |                   |
| NC_002505                         | 2122956            | SNP            | M                     | C              | 100             | 144    | 144      | Gene: Gene, CDS: O-succinylbenzoic acid--CoA ligase                                                             | Xxx110Trp         |
| NC_002505                         | 2148579            | SNP            | A                     | G              | 100             | 201    | 201      | Gene: Gene, CDS: protease IV                                                                                    |                   |
| NC_002505                         | 2153724            | SNP            | T                     | A              | 98.9            | 174    | 176      | Gene: Gene, CDS: hypothetical protein                                                                           | Ile106Asn         |
| NC_002505                         | 2179341            | SNP            | C                     | G              | 100             | 177    | 177      | Gene: maf, CDS: <i>maf</i>                                                                                      | Leu47Val          |
| NC_002505                         | 2318560            | SNP            | G                     | A              | 100             | 9      | 9        | Gene: Gene, CDS: hypothetical protein                                                                           | Leu19Phe          |
| NC_002505                         | 2378839            | SNP            | N                     | G              | 100             | 214    | 214      | Gene: Gene, CDS: GGDEF family protein                                                                           | Xxx227Ser         |
| NC_002505                         | 2379972            | SNP            | A                     | G              | 100             | 128    | 128      | Gene: <i>upp</i> , CDS: <i>upp</i>                                                                              | Ile135Thr         |
| NC_002505                         | 2488985            | SNP            | G                     | T              | 99.6            | 252    | 253      | Gene: Beta Galactosidase (LacZ)                                                                                 |                   |
| NC_002505                         | 2496376            | SNP            | T                     | C              | 100             | 196    | 196      | Gene: Gene, CDS: elongation factor G                                                                            | Ser370Gly         |
| NC_002505                         | 2590300            | SNP            | R                     | A              | 100             | 194    | 194      | Gene: Gene, CDS: 2',3'-cyclic-nucleotide 2'-phosphodiesterase, putative                                         | Xxx481Glu         |
| NC_002505                         | 2682957            | SNP            | R                     | G              | 100             | 178    | 178      | Gene: Gene, CDS: hypothetical protein                                                                           | Xxx73Pro          |
| NC_002505                         | 2682978            | SNP            | S                     | G              | 100             | 142    | 142      | Gene: Gene, CDS: hypothetical protein                                                                           | Xxx66Pro          |
| NC_002505                         | 2881400            | SNP            | C                     | A              | 98.8            | 164    | 166      | Gene: Gene, CDS: bifunctional (p)ppGpp synthetase II/ guanosine-3',5'-bis pyrophosphate 3'-pyrophosphohydrolase | Pro142His         |
| NC_002506                         | 44129              | SNP            | A                     | G              | 100             | 57     | 57       | Gene: Gene, CDS: serine/threonine transporter SstT                                                              | Val390Ala         |
| NC_002506                         | 85485              | SNP            | T                     | G              | 100             | 124    | 124      | Gene: Gene, CDS: hypothetical protein                                                                           | Ile247Leu         |
| NC_002506                         | 152561             | SNP            | C                     | A              | 99.6            | 247    | 248      | Gene: <i>glpT</i> , CDS: <i>glpT</i>                                                                            | Gly44Val          |
| NC_002506                         | 161478             | SNP            | C                     | G              | 99.3            | 133    | 134      | Gene: Gene, CDS: hypothetical protein                                                                           | Arg377Gly         |
| NC_002506                         | 186754             | SNP            | C                     | T              | 100             | 5      | 5        | Gene: Gene, CDS: hypothetical protein                                                                           |                   |
| NC_002506                         | 219397             | SNP            | T                     | C              | 99.2            | 131    | 132      | Gene: Gene, CDS: hypothetical protein                                                                           |                   |
| NC_002506                         | 277301             | SNP            | A                     | G              | 100             | 157    | 157      | Gene: Gene, CDS: sensor histidine kinase                                                                        |                   |
| NC_002506                         | 310944             | SNP            | G                     | T              | 100             | 17     | 17       |                                                                                                                 |                   |
| NC_002506                         | 310945             | SNP            | C                     | A              | 100             | 16     | 16       |                                                                                                                 |                   |
| NC_002506                         | 310946             | SNP            | T                     | A              | 100             | 9      | 9        |                                                                                                                 |                   |
| NC_002506                         | 312308             | SNP            | G                     | A              | 100             | 4      | 4        |                                                                                                                 |                   |
| NC_002506                         | 312309             | SNP            | C                     | A              | 100             | 10     | 10       |                                                                                                                 |                   |
| NC_002506                         | 312310             | SNP            | G                     | A              | 100             | 16     | 16       |                                                                                                                 |                   |
| NC_002506                         | 356433             | SNP            | Y                     | T              | 100             | 24     | 24       |                                                                                                                 |                   |
| NC_002506                         | 366180             | SNP            | Y                     | C              | 100             | 186    | 186      | Gene: Gene, CDS: toxin resistance protein                                                                       |                   |
| NC_002506                         | 566512             | SNP            | C                     | G              | 97.7            | 209    | 214      | Gene: Gene, CDS: hypothetical protein                                                                           | Arg256Pro         |
| NC_002506                         | 566513             | SNP            | G                     | C              | 100             | 204    | 204      | Gene: Gene, CDS: hypothetical protein                                                                           | Arg256Gly         |

Supplementary Table S1 (continued). Single Nucleotide Polymorphisms (SNPs) in the E7946 Sequence.

| Reference Genome used for mapping                                                         | Reference Position | Variation Type | Reference nucleotide* | SNP Variation* | Frequency (%)** | Counts | Coverage | Annotations for site                                                          | Amino Acid Change |
|-------------------------------------------------------------------------------------------|--------------------|----------------|-----------------------|----------------|-----------------|--------|----------|-------------------------------------------------------------------------------|-------------------|
| NC_002506                                                                                 | 588148             | SNP            | C                     | G              | 100             | 149    | 149      | Gene: Gene, CDS: PTS system, sucrose-specific IIBC component                  | Arg115Pro         |
| NC_002506                                                                                 | 646810             | SNP            | Y                     | T              | 100             | 220    | 220      | Gene: Gene, CDS: phosphoglycerate transport regulatory protein PgtB, putative |                   |
| NC_002506                                                                                 | 788542             | SNP            | G                     | T              | 99.6            | 228    | 229      |                                                                               |                   |
| NC_002506                                                                                 | 811408             | SNP            | T                     | C              | 100             | 216    | 216      | Gene: Gene, CDS: hypothetical protein                                         |                   |
| NC_002506                                                                                 | 886005             | SNP            | C                     | T              | 100             | 91     | 91       |                                                                               |                   |
| NC_002506                                                                                 | 894743             | SNP            | G                     | T              | 99.5            | 205    | 206      | Gene: <i>malF</i> , CDS: <i>malF</i>                                          | Phe397Leu         |
| NC_002506                                                                                 | 901045             | SNP            | C                     | T              | 100             | 206    | 206      | Gene: Gene, CDS: hypothetical protein                                         | Ser36Phe          |
| NC_002506                                                                                 | 980511             | SNP            | C                     | G              | 96.6            | 199    | 206      | Gene: Gene                                                                    |                   |
| NC_002506                                                                                 | 980512             | SNP            | G                     | C              | 100             | 201    | 201      | Gene: Gene                                                                    |                   |
| NC_002506                                                                                 | 980632             | SNP            | C                     | G              | 98.3            | 229    | 233      | Gene: Gene                                                                    |                   |
| NC_002506                                                                                 | 980633             | SNP            | G                     | C              | 97              | 227    | 234      | Gene: Gene                                                                    |                   |
| NC_002506                                                                                 | 986611             | SNP            | A                     | G              | 100             | 6      | 6        | Gene: Gene                                                                    |                   |
| NC_002506                                                                                 | 993684             | SNP            | C                     | A              | 100             | 101    | 101      | Gene: Gene, CDS: tagE protein                                                 |                   |
| NC_002506                                                                                 | 993701             | SNP            | T                     | C              | 100             | 7      | 7        | Gene: Gene, CDS: tagE protein                                                 | Arg200Gly         |
| NC_002506                                                                                 | 1004685            | SNP            | T                     | G              | 100             | 126    | 126      | Gene: Gene, CDS: LysR family transcriptional regulator                        | Val73Gly          |
| AB374228                                                                                  | 4195               | SNP            | A                     | T              | 99.6            | 239    | 240      | Gene: <i>cII</i> , CDS: <i>cII</i>                                            | Gln103Leu         |
| AB374228                                                                                  | 4296               | SNP            | A                     | T              | 100             | 87     | 87       | Gene: <i>cII</i> , CDS: <i>cII</i>                                            | Ser137Cys         |
| AB374228                                                                                  | 4302               | SNP            | A                     | G              | 100             | 99     | 99       | Gene: <i>cII</i> , CDS: <i>cII</i>                                            | Thr139Ala         |
| *IUPAC notation                                                                           |                    |                |                       |                |                 |        |          |                                                                               |                   |
| **Frequency is equal to number of SNP reads (count) divided by the total reads (coverage) |                    |                |                       |                |                 |        |          |                                                                               |                   |

**Supplementary Table S2. Deletion/Insertion Polymorphisms (DIPs) in the E7946 Sequence.**

| Reference Genome used for mapping | Reference Position | Length | Reference nucleotide* | DIP Variation* | Frequency (%)** | Counts | Coverage | Annotations for site                                                          | Amino Acid Change  |
|-----------------------------------|--------------------|--------|-----------------------|----------------|-----------------|--------|----------|-------------------------------------------------------------------------------|--------------------|
| NC_002505                         | 359986             | 1      | -                     | T              | 85.3            | 185    | 217      | Gene: Gene, CDS: ribosome-associated GTPase                                   | Change, frameshift |
| NC_002505                         | 424645             | 1      | -                     | G              | 87              | 120    | 138      | Gene: Gene, CDS: regulatory protein CsrD                                      | Change, frameshift |
| NC_002505                         | 424670             | 1      | G                     | -              | 88.2            | 67     | 76       | Gene: Gene, CDS: regulatory protein CsrD                                      | Change, frameshift |
| NC_002505                         | 479266             | 1      | G                     | -              | 94.2            | 196    | 208      |                                                                               |                    |
| NC_002505                         | 540850             | 1      | C                     | -              | 90.3            | 176    | 195      |                                                                               |                    |
| NC_002505                         | 553569             | 1      | -                     | C              | 97.4            | 190    | 195      | Gene: <i>dnaG</i> , CDS: <i>dnaG</i>                                          | Change, frameshift |
| NC_002505                         | 555404             | 1      | -                     | G              | 79.2            | 80     | 101      | Gene: <i>gcp</i> , CDS: <i>gcp</i>                                            | Change, frameshift |
| NC_002505                         | 612959             | 1      | -                     | A              | 86.8            | 165    | 190      | Gene: Gene                                                                    |                    |
| NC_002505                         | 623228             | 1      | -                     | G              | 94              | 205    | 218      | Gene: Gene, CDS: glutamyl-Q tRNA(Asp) synthetase                              | Change, frameshift |
| NC_002505                         | 638168             | 1      | -                     | T              | 90.5            | 218    | 241      | Gene: Gene                                                                    |                    |
| NC_002505                         | 807832             | 1      | -                     | G              | 95.5            | 171    | 179      |                                                                               |                    |
| NC_002505                         | 849965             | 1      | -                     | G              | 89.2            | 91     | 102      | Gene: Gene, Gene: <i>oadA-2</i> , CDS: <i>oadA-2</i>                          | Change, frameshift |
| NC_002505                         | 872713             | 1      | -                     | A              | 81.4            | 114    | 140      |                                                                               |                    |
| NC_002505                         | 881244             | 1      | -                     | T              | 87.8            | 158    | 180      | Gene: Gene, CDS: hypothetical protein                                         | Change, frameshift |
| NC_002505                         | 998435             | 1      | -                     | C              | 95.8            | 205    | 214      | Gene: Gene, Gene: Gene, CDS: hypothetical protein, CDS: hypothetical protein  | Change, frameshift |
| NC_002505                         | 1087962            | 1      | -                     | G              | 95.4            | 103    | 108      | Gene: <i>uvrB</i> , CDS: <i>uvrB</i>                                          | Change, frameshift |
| NC_002505                         | 1145407            | 1      | -                     | G              | 90.6            | 116    | 128      | Gene: Gene, CDS: AraC/XylS family transcriptional regulator                   | Change, frameshift |
| NC_002505                         | 1228191            | 1      | -                     | C              | 91.9            | 113    | 123      | Gene: Gene, Gene: Gene, CDS: sensor histidine kinase, CDS: response regulator | Change, frameshift |
| NC_002505                         | 1337746            | 1      | T                     | -              | 85.5            | 106    | 124      |                                                                               |                    |
| NC_002505                         | 1389484            | 1      | -                     | C              | 90.8            | 138    | 152      | Gene: Gene                                                                    |                    |
| NC_002505                         | 1470952            | 1      | -                     | G              | 96              | 167    | 174      | Gene: Gene, CDS: GGDEF family protein                                         | Change, frameshift |
| NC_002505                         | 1486534            | 1      | -                     | C              | 88.5            | 54     | 61       | Gene: Gene                                                                    |                    |
| NC_002505                         | 1489715            | 1      | -                     | T              | 81.7            | 161    | 197      | Gene: Gene, CDS: chemotaxis protein methyltransferase CheR                    | Change, frameshift |
| NC_002505                         | 1530608            | 1      | -                     | C              | 79.7            | 55     | 69       |                                                                               |                    |
| NC_002505                         | 1618601            | 1      | -                     | C              | 91.8            | 157    | 171      | Gene: Gene, CDS: hypothetical protein                                         | Change, frameshift |
| NC_002505                         | 1625933            | 1      | -                     | C              | 91.6            | 98     | 107      | Gene: Gene                                                                    |                    |
| NC_002505                         | 1649049            | 1      | C                     | -              | 90.4            | 103    | 114      | Gene: Gene, CDS: hypothetical protein                                         | Change, frameshift |
| NC_002505                         | 1676600            | 1      | -                     | C              | 87.6            | 113    | 129      | Gene: Gene, CDS: hypothetical protein                                         | Change, frameshift |
| NC_002505                         | 1676702            | 1      | -                     | C              | 95.2            | 216    | 227      | Gene: Gene, CDS: hypothetical protein                                         | Change, frameshift |
| NC_002505                         | 1676704            | 1      | -                     | A              | 86              | 203    | 236      | Gene: Gene, CDS: hypothetical protein                                         | Change, frameshift |
| NC_002505                         | 1748765            | 1      | -                     | C              | 92.4            | 133    | 144      | Gene: Gene                                                                    |                    |
| NC_002505                         | 1771830            | 1      | -                     | A              | 85.8            | 199    | 232      | Gene: Gene, CDS: hypothetical protein                                         | Change, frameshift |
| NC_002505                         | 1875074            | 1      | -                     | T              | 84.1            | 191    | 227      | Gene: Gene, CDS: hypothetical protein                                         | Change, frameshift |
| NC_002505                         | 1900854            | 1      | T                     | -              | 86.9            | 185    | 213      | Gene: Gene, CDS: hypothetical protein                                         | Change, frameshift |



Supplementary Table S2 (continued). Deletion/Insertion Polymorphisms (DIPs) in the E7946 Sequence.

| Reference Genome used for mapping | Reference Position | Length | Reference nucleotide* | DIP Variation* | Frequency (%)** | Counts | Coverage | Annotations for site                                                               | Amino Acid Change  |
|-----------------------------------|--------------------|--------|-----------------------|----------------|-----------------|--------|----------|------------------------------------------------------------------------------------|--------------------|
| NC_002505                         | 1990030            | 1      | -                     | T              | 93.8            | 121    | 129      | Gene: Gene, CDS: UDP-2,3-diacetylglucosamine hydrolase                             | Change, frameshift |
| NC_002505                         | 2051793            | 1      | -                     | C              | 80.9            | 161    | 199      |                                                                                    |                    |
| NC_002505                         | 2081077            | 1      | -                     | C              | 90.1            | 183    | 203      |                                                                                    |                    |
| NC_002505                         | 2194678            | 1      | -                     | G              | 88.1            | 155    | 176      | Gene: Gene, CDS: hypothetical protein                                              | Change, frameshift |
| NC_002505                         | 2262543            | 1      | T                     | -              | 83.3            | 169    | 203      | Gene: Gene, Gene: Gene, CDS: hypothetical protein, CDS: hypothetical protein       | Change, frameshift |
| NC_002505                         | 2266655            | 1      | -                     | C              | 94.7            | 89     | 94       | Gene: Gene                                                                         |                    |
| NC_002505                         | 2318560            | 1      | G                     | -              | 91              | 91     | 100      | Gene: Gene, CDS: hypothetical protein                                              | Change, frameshift |
| NC_002505                         | 2358194            | 1      | -                     | C              | 92.9            | 221    | 238      | Gene: <i>vibF</i> , CDS: <i>vibF</i>                                               | Change, frameshift |
| NC_002505                         | 2365248            | 1      | -                     | G              | 85.8            | 187    | 218      |                                                                                    |                    |
| NC_002505                         | 2489046            | 1      | -                     | G              | 91.9            | 148    | 161      | Gene: Beta Galactosidase (LacZ)                                                    |                    |
| NC_002505                         | 2564032            | 1      | -                     | C              | 90.1            | 182    | 202      | Gene: <i>lpxC</i> , CDS: <i>lpxC</i>                                               | Change, frameshift |
| NC_002505                         | 2612864            | 1      | -                     | C              | 87.1            | 128    | 147      | Gene: Gene                                                                         |                    |
| NC_002505                         | 2657595            | 1      | -                     | C              | 95.5            | 213    | 223      | Gene: Gene, CDS: hypothetical protein                                              | Change, frameshift |
| NC_002505                         | 2738434            | 1      | -                     | C              | 92.7            | 203    | 219      | Gene: Gene, CDS: hypothetical protein                                              | Change, frameshift |
| NC_002505                         | 2839613            | 1      | -                     | C              | 96.8            | 181    | 187      | Gene: Gene, CDS: ribonuclease activity regulator protein RraA                      | Change, frameshift |
| NC_002505                         | 2879855            | 1      | T                     | -              | 91              | 181    | 199      | Gene: Gene, CDS: hypothetical protein                                              | Change, frameshift |
| NC_002505                         | 2907037            | 1      | -                     | G              | 90.3            | 187    | 207      | Gene: Gene                                                                         |                    |
| NC_002506                         | 17393              | 1      | C                     | -              | 96.5            | 165    | 171      | Gene: Gene, Gene: Gene, CDS: hypothetical protein, CDS: glyco-gen branching enzyme | Change, frameshift |
| NC_002506                         | 53608              | 1      | T                     | -              | 90.8            | 177    | 195      | Gene: Gene, Gene: Gene, CDS: hypothetical protein, CDS: protease-related protein   | Change, frameshift |
| NC_002506                         | 57465              | 1      | -                     | G              | 89.6            | 103    | 115      | Gene: Gene, Gene: Gene, CDS: GGDEF family protein, CDS: hypothetical protein       | Change, frameshift |
| NC_002506                         | 97575              | 1      | G                     | -              | 92.2            | 202    | 219      | Gene: Gene, CDS: proton/glutamate symporter                                        | Change, frameshift |
| NC_002506                         | 144626             | 1      | A                     | -              | 82.4            | 122    | 148      | Gene: <i>rbsC</i> , CDS: <i>rbsC</i>                                               | Change, frameshift |
| NC_002506                         | 184512             | 1      | -                     | C              | 87              | 47     | 54       |                                                                                    |                    |
| NC_002506                         | 186168             | 1      | -                     | G              | 98.9            | 86     | 87       | Gene: Gene, Gene: Gene, CDS: hypothetical protein, CDS: hypothetical protein       | Change, frameshift |
| NC_002506                         | 255374             | 1      | -                     | G              | 83              | 78     | 94       | Gene: Gene                                                                         |                    |
| NC_002506                         | 279450             | 1      | -                     | C              | 87.6            | 113    | 129      | Gene: Gene, CDS: hypothetical protein                                              | Change, frameshift |
| NC_002506                         | 294983             | 1      | -                     | G              | 86.6            | 97     | 112      | Gene: Gene                                                                         |                    |
| NC_002506                         | 299055             | 1      | G                     | -              | 94.8            | 184    | 194      | Gene: Gene                                                                         |                    |
| NC_002506                         | 299080             | 1      | C                     | -              | 87.1            | 121    | 139      | Gene: Gene                                                                         |                    |
| NC_002506                         | 403877             | 1      | -                     | G              | 95.1            | 117    | 123      | Gene: Gene, CDS: hypothetical protein                                              | Change, frameshift |
| NC_002506                         | 472297             | 1      | A                     | -              | 97.4            | 149    | 153      | Gene: Gene                                                                         |                    |
| NC_002506                         | 474527             | 1      | -                     | C              | 90              | 208    | 231      | Gene: Gene, CDS: hypothetical protein                                              | Change, frameshift |
| NC_002506                         | 530511             | 1      | A                     | -              | 96.1            | 149    | 155      |                                                                                    |                    |

Supplementary Table S2 (continued). Deletion/Insertion Polymorphisms (DIPs) in the E7946 Sequence.

| Reference Genome used for mapping | Reference Position | Length | Reference nucleotide* | DIP Variation* | Frequency (%)** | Counts | Coverage | Annotations for site                                                         | Amino Acid Change  |
|-----------------------------------|--------------------|--------|-----------------------|----------------|-----------------|--------|----------|------------------------------------------------------------------------------|--------------------|
| NC_002506                         | 535093             | 1      | G                     | -              | 93.4            | 211    | 226      | Gene: Gene, Gene: Gene, CDS: hypothetical protein                            | Change, frameshift |
| NC_002506                         | 545436             | 1      | -                     | C              | 92.3            | 179    | 194      |                                                                              |                    |
| NC_002506                         | 609601             | 1      | -                     | G              | 94.1            | 144    | 153      | Gene: Gene                                                                   |                    |
| NC_002506                         | 631352             | 1      | -                     | G              | 95.3            | 204    | 214      | Gene: Gene                                                                   |                    |
| NC_002506                         | 631405             | 1      | -                     | G              | 86.7            | 104    | 120      | Gene: Gene                                                                   |                    |
| NC_002506                         | 686744             | 1      | -                     | C              | 96              | 166    | 173      |                                                                              |                    |
| NC_002506                         | 690275             | 1      | A                     | -              | 97.2            | 141    | 145      | Gene: Gene                                                                   |                    |
| NC_002506                         | 743256             | 1      | -                     | G              | 89              | 121    | 136      |                                                                              |                    |
| NC_002506                         | 765560             | 1      | G                     | -              | 92.9            | 65     | 70       | Gene: Gene, CDS: magnesium transporter MgtE_putative                         | Change, frameshift |
| NC_002506                         | 769970             | 1      | -                     | T              | 94.8            | 147    | 155      | Gene: Gene, CDS: diaminobutyrate--2-oxoglutarate aminotransferase            | Change, frameshift |
| NC_002506                         | 771746             | 1      | -                     | G              | 97.6            | 160    | 164      |                                                                              |                    |
| NC_002506                         | 775705             | 1      | -                     | G              | 89.3            | 216    | 242      | Gene: Gene, CDS: acetoacetyl-CoA synthetase                                  | Change, frameshift |
| NC_002506                         | 869466             | 1      | -                     | C              | 93.7            | 178    | 190      |                                                                              |                    |
| NC_002506                         | 889857             | 1      | -                     | G              | 90.1            | 146    | 162      | Gene: Gene                                                                   |                    |
| NC_002506                         | 893324             | 1      | A                     | -              | 94.2            | 210    | 223      |                                                                              |                    |
| NC_002506                         | 969852             | 1      | -                     | T              | 92.5            | 209    | 226      | Gene: Gene, Gene: Gene, CDS: hypothetical protein, CDS: hypothetical protein | Change, frameshift |
| NC_002506                         | 980877             | 1      | G                     | -              | 95              | 191    | 201      | Gene: Gene                                                                   |                    |
| NC_002506                         | 980886             | 1      | -                     | G              | 92.8            | 192    | 207      | Gene: Gene                                                                   |                    |
| NC_002506                         | 981512             | 1      | A                     | -              | 92.4            | 121    | 131      | Gene: Gene                                                                   |                    |
| NC_002506                         | 986611             | 2      | AA                    | --             | 97.5            | 118    | 121      | Gene: Gene                                                                   |                    |
| NC_002506                         | 993674             | 1      | C                     | -              | 88.3            | 91     | 103      | Gene: Gene, CDS: tagE protein                                                | Change, frameshift |
| NC_002506                         | 993700             | 2      | CT                    | --             | 94              | 78     | 83       | Gene: Gene, CDS: tagE protein                                                | Change, frameshift |
| NC_002506                         | 1036512            | 1      | -                     | G              | 95.7            | 267    | 279      | Gene: Gene, CDS: hypothetical protein                                        | Change, frameshift |
| NC_002506                         | 1045002            | 1      | -                     | G              | 94.3            | 215    | 228      | Gene: Gene                                                                   |                    |
| NC_002506                         | 1060870            | 1      | -                     | C              | 94.9            | 168    | 177      | Gene: Gene                                                                   |                    |
| NC_002506                         | 1060888            | 1      | -                     | C              | 91.7            | 133    | 145      | Gene: Gene                                                                   |                    |
| NC_002506                         | 1062459            | 1      | -                     | G              | 96.2            | 176    | 183      | Gene: Gene, CDS: hypothetical protein                                        | Change, frameshift |
| AB374228                          | 4914               | 1      | A                     | -              | 74.2            | 196    | 264      |                                                                              |                    |
| AB374228                          | 5689               | 1      | -                     | G              | 92.8            | 206    | 222      | Gene: kp9, CDS: kp9                                                          | Change, frameshift |
| AB374228                          | 7865               | 1      | -                     | C              | 80.5            | 99     | 123      | Gene: rep, CDS: rep                                                          | Change, frameshift |
| AB374228                          | 17096              | 1      | -                     | A              | 94.5            | 224    | 237      | Gene: kp24, CDS: kp24                                                        | Change, frameshift |
| AB374228                          | 19381              | 1      | -                     | G              | 98.7            | 74     | 75       | Gene: kp28, CDS: kp28                                                        | Change, frameshift |
| AB374228                          | 22704              | 2      | --                    | GC             | 82.2            | 176    | 214      | Gene: kp36, CDS: kp36                                                        | Change, frameshift |

\*IUPAC notation  
 \*\*Frequency is equal to number of SNP reads (count) divided by the total reads (coverage)
